# Supplementary material for: DSCOVR/EPIC-derived global hourly and daily downward shortwave and photosynthetically active radiation data at 0.1° × 0.1° resolution
Source: Copernicus journal article supplement (doi:10.5194/essd-12-2209-2020), 2020-09-15
Supplement: Supplementary file 1 [file essd-12-2209-2020-supplement.pdf]

Supplement of Earth Syst. Sci. Data, 12, 2209–2221, 2020  
<https://doi.org/10.5194/essd-12-2209-2020-supplement>  
© Author(s) 2020. This work is distributed under  
the Creative Commons Attribution 4.0 License.

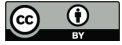

*Supplement of*

## **DSCOVER/EPIC-derived global hourly and daily downward shortwave and photosynthetically active radiation data at $0.1^\circ \times 0.1^\circ$ resolution**

**Dalei Hao et al.**

*Correspondence to:* Min Chen ([min.chen@pnnl.gov](mailto:min.chen@pnnl.gov))

The copyright of individual parts of the supplement might differ from the CC BY 4.0 License.

**Table S1.** Ground-based stations used in this study, with designated abbreviations, geographical locations, elevations above sea level, and associated sponsoring projects and programs.

| Station name                 | Abbreviation | Location                 | Latitude (°) | Longitude (°) | Altitude (m) | Project                                            |
|------------------------------|--------------|--------------------------|--------------|---------------|--------------|----------------------------------------------------|
| Ny Alesund, Norway           | NYA          | Polar, Island/Coast      | 78.93        | 11.93         | 11           | BSRN                                               |
| Tiksi, Russia                | TIK          | Polar, Tundra            | 71.59        | 128.92        | 48           | BSRN                                               |
| N Slope Alaska               | NSA          | Polar, Alaska, US        | 71.32        | -156.61       | 8            | DOE Atmospheric Research Measurement (ARM) Program |
| Barrow, AK                   | BAR          | Polar, Alaska, US        | 71.32        | -156.61       | 8            | BSRN                                               |
| Toravere, Estonia            | TOR          | Rural, Grassland         | 58.25        | 26.46         | 70           | BSRN                                               |
| Lindenberg, Germany          | LIN          | Rural, Cropland          | 52.22        | 14.12         | 125          | BSRN                                               |
| Cabau, Netherlands           | CAB          | Northern Europe          | 51.97        | 4.93          | 0            | BSRN                                               |
| Fort Peck, MT                | FPK          | Rural, Grassland         | 48.31        | -105.1        | 634          | SURFRAD                                            |
| Carpentras, France           | CAR          | Central Europe           | 44.08        | 5.06          | 100          | BSRN                                               |
| Sioux Falls, SD              | SXF          | Rural, Cropland          | 43.73        | -96.62        | 473          | SURFRAD                                            |
| Sapporo, Japan               | SAP          | Urban                    | 43.06        | 141.33        | 17           | BSRN                                               |
| CENER, Spain                 | CNR          | Pamplona, Spain          | 42.82        | -1.6          | 471          | BSRN                                               |
| Penn State, PA               | PSU          | Rural, Hilly             | 40.72        | -77.93        | 376          | SURFRAD                                            |
| Boulder, CO (Table Mountain) | BOS          | Rural, Mountains         | 40.13        | -105.24       | 1689         | SURFRAD                                            |
| Boulder Tower, Colorado, USA | BOU          | High Plains, Central US  | 40.05        | -105.01       | 1584         | BSRN                                               |
| Bondville, IL                | BON          | Rural, Cropland          | 40.05        | -88.37        | 230          | SURFRAD                                            |
| Xiang, China                 | XIA          | Desert, Rural            | 39.75        | 116.96        | 32           | BSRN                                               |
| Ashton, Kansas, USA          | E09          | Great Plains, Central US | 37.13        | -97.27        | 386          | DOE (ARM) Program                                  |
| Byron, Oklahoma, USA         | E11          | Great Plains, Central US | 36.88        | -98.28        | 360          | DOE (ARM) Program                                  |
| Pawhuska, Oklahoma, USA      | E12          | Great Plains, Central US | 36.84        | -96.43        | 331          | DOE (ARM) Program                                  |
| Desert Rock, NV              | DRA          | Desert, Hilly            | 36.63        | -116.02       | 1007         | SURFRAD                                            |

|                                           |        |                                |        |        |      |                   |
|-------------------------------------------|--------|--------------------------------|--------|--------|------|-------------------|
| ARM/SGP Central Facility (Best Est. Flux) | BEF    | Great Plains, Central US       | 36.61  | -97.48 | 318  | DOE (ARM) Program |
| ARM/SGP Central Facility C01              | C01    | Great Plains, Central US       | 36.61  | -97.48 | 318  | DOE (ARM) Program |
| ARM/SGP Central Facility Lamont, OK       | E13    | Great Plains, Central US       | 36.61  | -97.48 | 318  | DOE (ARM) Program |
| Ringwood, Oklahoma, USA                   | E15    | Great Plains, Central US       | 36.43  | -98.28 | 418  | DOE (ARM) Program |
| Tateno, Japan                             | TAT    | Urban                          | 36.05  | 140.13 | 25   | BSRN              |
| Meeker, Oklahoma, USA                     | E20    | Great Plains, Central US       | 35.56  | -96.99 | 309  | DOE (ARM) Program |
| Goodwin Creek, MS                         | GCR    | Rural, Cropland                | 34.25  | -89.87 | 98   | SURFRAD           |
| Fukuoka, Japan                            | FUA    | Urban Landscape                | 33.58  | 130.38 | 3    | BSRN              |
| Bermuda                                   | BER    | N Atlantic Ocean, Island       | 32.3   | -64.77 | 60   | BSRN              |
| Izana, Tenerife Island Spain              | IZA    | Mountain Top, E Atlantic       | 28.31  | -16.5  | 2373 | BSRN              |
| Ishigakijima, Japan                       | ISH    | Rural Japan                    | 24.34  | 124.16 | 6    | BSRN              |
| Tamanrasset, Algeria                      | TAM    | Desert, Hilly                  | 22.79  | 5.53   | 1385 | BSRN              |
| Kwajalein Island                          | KWA    | Island Atoll, Tropical Pacific | 8.72   | 167.72 | 10   | BSRN              |
| Petrolina, Brazil                         | PTR    | Rural                          | -9.07  | -40.32 | 387  | BSRN              |
| Cocos Island                              | COC    | Tropical Indian Ocean          | -12.15 | 96.83  | 0    | BSRN              |
| Darwin, Australia                         | DWN    | Tropical West Pacific          | -12.43 | 130.89 | 30   | BSRN              |
| Gobabeb Namib Desert                      | GOB    | Namibia                        | -23.56 | 15.04  | 407  | BSRN              |
| Alice Springs, Australia                  | ASP    | Desert, Central Australia      | -23.8  | 133.89 | 547  | BSRN              |
| Sao Martinho da Serra, Brazil             | SMS    | Rural                          | -29.44 | -53.82 | 489  | BSRN              |
| De Aar, South Africa                      | DAA    | Grassland, S Africa            | -30.67 | 24     | 1311 | BSRN              |
| Lauder, Zealand                           | LAU    | Rural, Cropland                | -45.03 | 169.68 | 370  | BSRN              |
| Dome Antarctica                           | C, DOM | Antarctic Plateau              | -75.1  | 123.38 | 3233 | BSRN              |

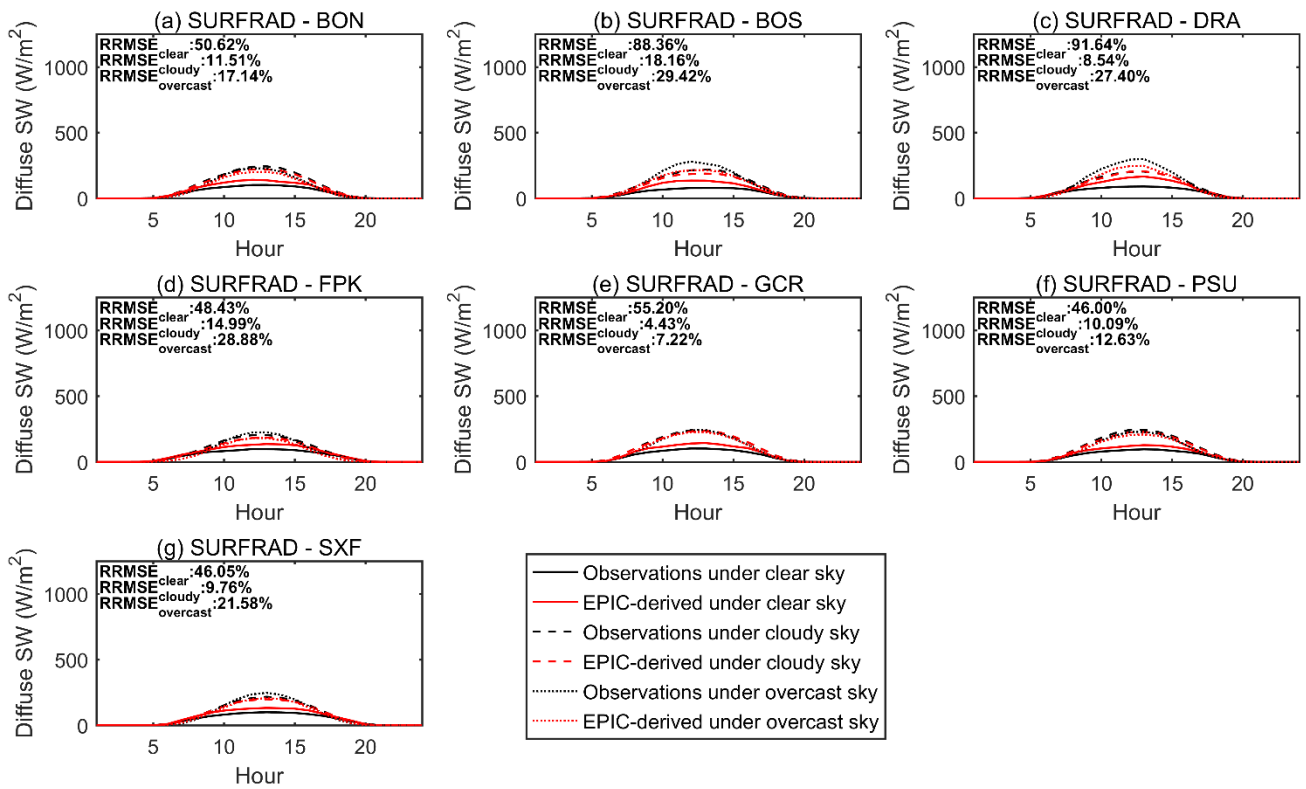

**Fig. S1.** Averaged diurnal variations of EPIC- and ground-based diffuse SW radiation flux ( $\text{W/m}^2$ ) under different sky conditions at 7 SURFRAD sites.

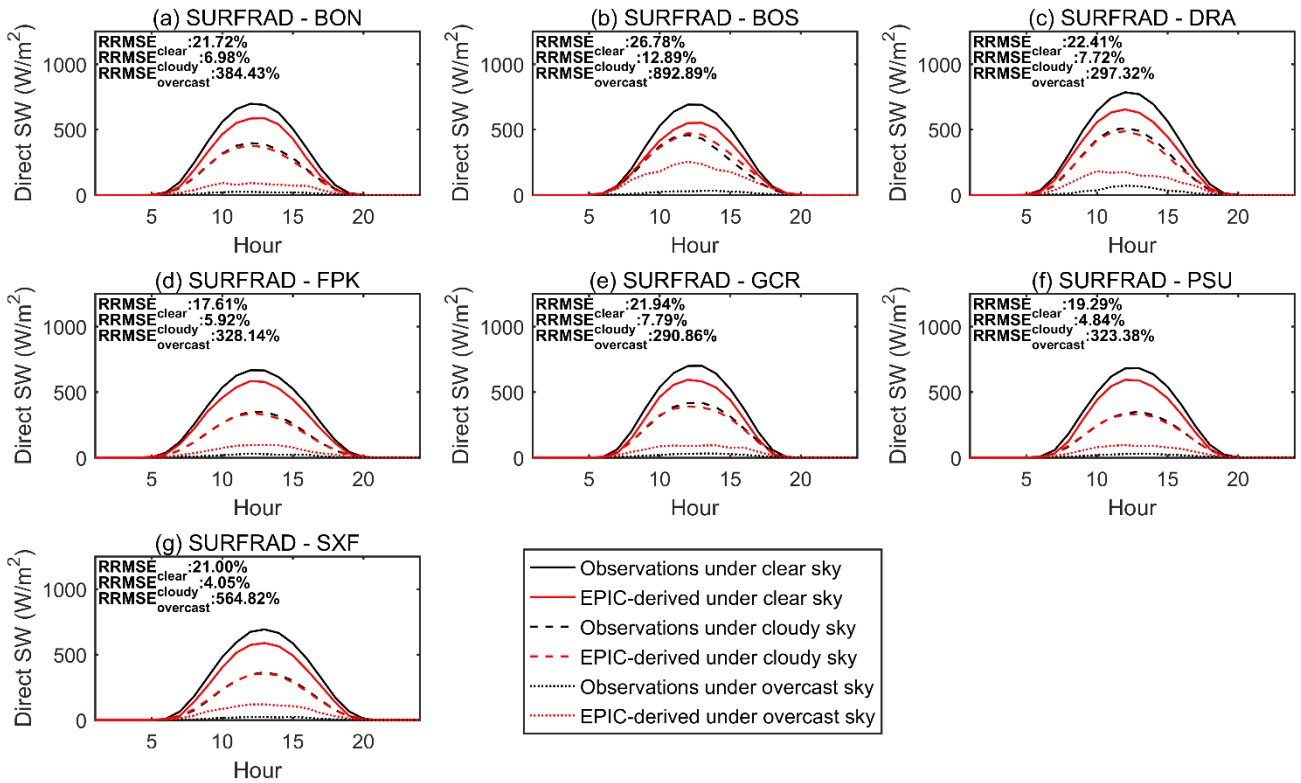

**Fig. S2.** Averaged diurnal variations of EPIC- and ground-based direct SW radiation flux ( $\text{W}/\text{m}^2$ ) under different sky conditions at 7 SURFRAD sites.

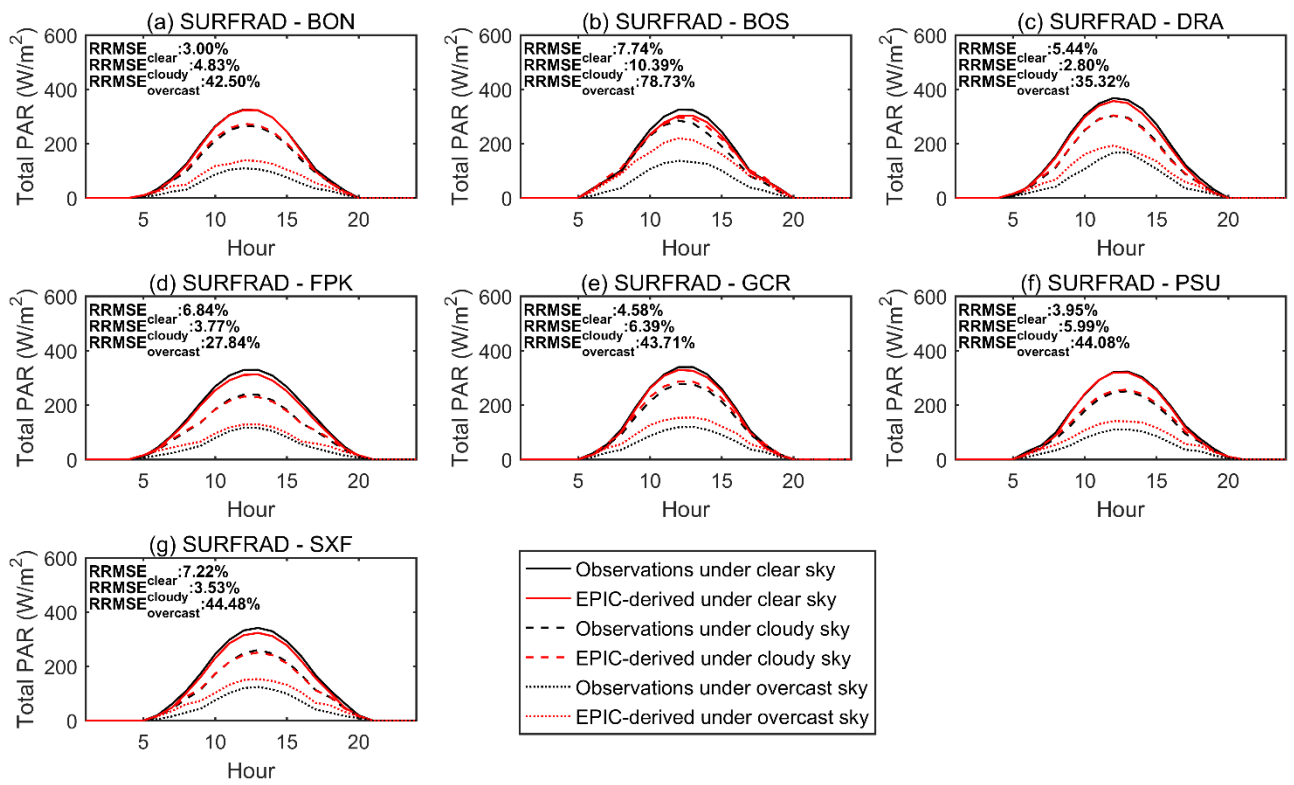

**Fig. S3.** Averaged diurnal variations of EPIC- and ground-based total PAR flux ( $\text{W/m}^2$ ) under different sky conditions at 7 SURFRAD sites.

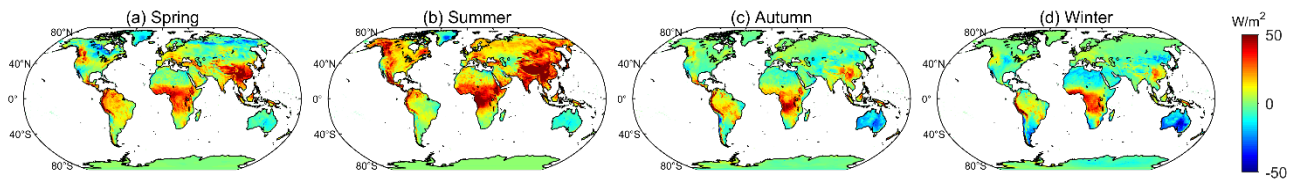

**Fig. S4.** Global distributions of the differences between EPIC- and CERES-based total SW radiation flux ( $\text{W}/\text{m}^2$ ) for different seasons during the study period (2016-2018).

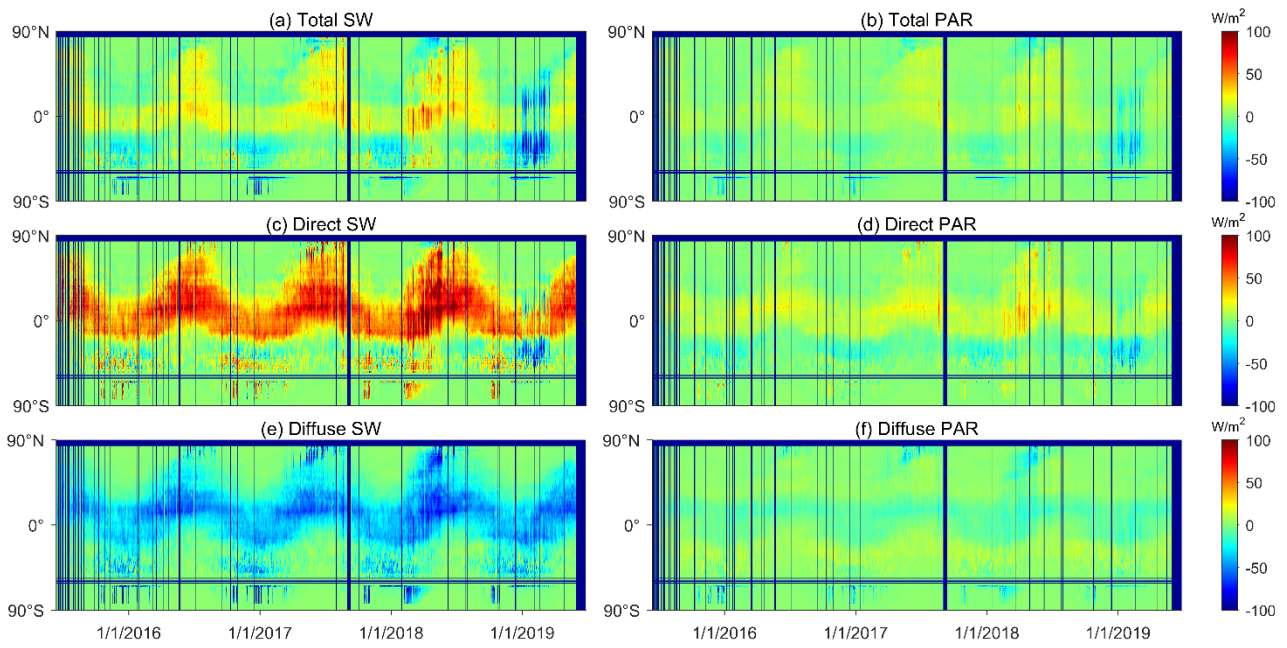

**Fig. S5.** Temporal variations of the differences between EPIC- and CERES-based zonally-averaged daily SW/PAR fluxes ( $W/m^2$ ) over global land areas.
